# Supplementary material for: Assessing Space Tourism Propensity: A New Questionnaire for Future Space Tourists
Source: MDPI journal article supplement (doi:10.3390/aerospace10121018), 2023-12-06
Supplement: s1 [file s1]

**Assessing Space Tourism Propensity: A New Questionnaire for Future Space Tourists**

**Supplementary Materials**

**Table S1.** Ad hoc questionnaire for space tourism.

| Item | Question                                                                                           | Response scale                                                                                                      |
|------|----------------------------------------------------------------------------------------------------|---------------------------------------------------------------------------------------------------------------------|
| 1    | Before reading the above, were you familiar with space travel?                                     | 0 = no<br>1 = yes                                                                                                   |
| 2*   | How significant do you consider the growth of the space industry?                                  | from 1 (not at all) to 9 (extremely)                                                                                |
| 3*   | Would you like to travel to space if space tourism became a reality for all?                       | from 1 (definitely not) to 9 (definitely yes)                                                                       |
| 4    | How soon do you think it will be possible to access space tourism?                                 | 1 = within five years<br>2 = in 6-10 years<br>3 = in 11-15 years<br>4 = in 16-20 years<br>5 = in more than 20 years |
| 5*   | How much landing on Earth from space would motivate you to go into space?                          | from 1 (definitely not) to 9 (definitely yes)                                                                       |
| 6*   | How much viewing the Earth from space would motivate you to go into space?                         | from 1 (definitely not) to 9 (definitely yes)                                                                       |
| 7*   | How much experiencing weightlessness would motivate you to go into space?                          | from 1 (definitely not) to 9 (definitely yes)                                                                       |
| 8*   | How much watching space in depth would motivate you to go into space?                              | from 1 (definitely not) to 9 (definitely yes)                                                                       |
| 9*   | How much walking in space would motivate you to go into space?                                     | from 1 (definitely not) to 9 (definitely yes)                                                                       |
| 10*  | How much doing scientific experiments would motivate you to go into space?                         | from 1 (definitely not) to 9 (definitely yes)                                                                       |
| 11*  | How much doing sports activities in weightlessness conditions would motivate you to go into space? | from 1 (definitely not) to 9 (definitely yes)                                                                       |
| 12*  | Once in Space, how long would you like to stay?                                                    | 1 = few hours                                                                                                       |

|       |                                                                                                                    |                         |
|-------|--------------------------------------------------------------------------------------------------------------------|-------------------------|
|       |                                                                                                                    | 2 = one day             |
|       |                                                                                                                    | 3 = two-three days      |
|       |                                                                                                                    | 4 = one week            |
|       |                                                                                                                    | 5 = some weeks          |
| <hr/> |                                                                                                                    |                         |
|       |                                                                                                                    | 1 = none                |
|       |                                                                                                                    | 2 = one                 |
| 13*   | In your lifetime, how many trips to space would you like to take?                                                  | 3 = a few               |
|       |                                                                                                                    | 4 = as more as possible |
| <hr/> |                                                                                                                    |                         |
|       |                                                                                                                    | 1 = up to 5K €          |
|       |                                                                                                                    | 2 = up to 10K €         |
| 14    | How much would you be willing to pay for your trip in space?                                                       | 3 = up to 50K €         |
|       |                                                                                                                    | 4 = up to 100K €        |
|       |                                                                                                                    | 5 = more than 100K €    |
| <hr/> |                                                                                                                    |                         |
|       |                                                                                                                    | 1 = the governments     |
| 15    | As a tax-paying citizen, who do you think should take responsibility for space tourism investment and development? | 2 = private individuals |
|       |                                                                                                                    | 3 = both                |
| <hr/> |                                                                                                                    |                         |
| 16    | Would you be willing to invest in stocks of companies involved in space tourism?                                   | 0 = no                  |
|       |                                                                                                                    | 1 = yes                 |
| <hr/> |                                                                                                                    |                         |
| 17    | Indicatively how many euros would you be willing to invest?                                                        | [open response]         |
| <hr/> |                                                                                                                    |                         |
|       |                                                                                                                    | 0 = no                  |
| 18    | Would you like to learn more about space tourism?                                                                  | 1 = yes                 |
| <hr/> |                                                                                                                    |                         |

***Note.** The asterisk indicated the items included into the PCA for the STP-Q.*

### Social distance scale (SD)

**Question:** "How concerned are you about the living conditions of the following groups of people?"

---

|                                                          |   |   |   |   |   |   |   |   |   |
|----------------------------------------------------------|---|---|---|---|---|---|---|---|---|
| <b>a) Your family</b>                                    | 1 | 2 | 3 | 4 | 5 | 6 | 7 | 8 | 9 |
| <b>b) Your townspeople</b>                               | 1 | 2 | 3 | 4 | 5 | 6 | 7 | 8 | 9 |
| <b>c) Italians</b>                                       | 1 | 2 | 3 | 4 | 5 | 6 | 7 | 8 | 9 |
| <b>d) Europeans/ Asians/<br/>Middle Easterners, etc.</b> | 1 | 2 | 3 | 4 | 5 | 6 | 7 | 8 | 9 |
| <b>e) Humanity</b>                                       | 1 | 2 | 3 | 4 | 5 | 6 | 7 | 8 | 9 |

---

*Note.* The numerical response scale ranges from 1 ("Not at all") to 9 ("Extremely").

**Table S2.** Descriptive analysis and frequencies of recorded variables.

| <i>Variables</i>       | <i>Mean</i> | <i>St. Deviation</i> | <i>Frequencies</i>                                      |
|------------------------|-------------|----------------------|---------------------------------------------------------|
| Gender                 |             |                      | 57,1% women;<br>42.9% men                               |
| Age                    | 20.96       | 2.58                 |                                                         |
| Education              |             |                      | 91,6% high school degree;<br>8.4% bachelor's degree     |
| Marital Status         |             |                      | 55,3% single;<br>44.7% in a relationship                |
| Income                 |             |                      | 72,4% none;<br>15,3% low;<br>11,4% medium;<br>0,9% high |
| SD family              | 1.98        | 1.79                 |                                                         |
| SD townspeople         | 4.46        | 1.87                 |                                                         |
| SD italians            | 4.24        | 1.78                 |                                                         |
| SD<br>europeans/asians | 4.64        | 1.90                 |                                                         |
| SD humanity            | 3.26        | 1.90                 |                                                         |
| SD mean score          | 3.72        | 1.39                 |                                                         |
| ST-Q_item 1            |             |                      | 54.4% yes;<br>45.6% no                                  |
| ST-Q_item 2            | 6.75        | 1.65                 |                                                         |
| ST-Q_item 3            | 7.72        | 1.94                 |                                                         |
| ST-Q_item 4            | 3.41        | 1.16                 |                                                         |
| ST-Q_item 5            | 5.77        | 2.26                 |                                                         |
| ST-Q_item 6            | 7.96        | 1.58                 |                                                         |
| ST-Q_item 7            | 7.40        | 1.99                 |                                                         |
| ST-Q_item 8            | 7.40        | 2.09                 |                                                         |

|                           |                                                                                                                |       |
|---------------------------|----------------------------------------------------------------------------------------------------------------|-------|
| <i>ST-Q_item 9</i>        | 7.35                                                                                                           | 2.15  |
| <i>ST-Q_item 10</i>       | 6.28                                                                                                           | 2.29  |
| <i>ST-Q_item 11</i>       | 5.76                                                                                                           | 2.70  |
| <i>ST-Q_item 12</i>       | 2.90                                                                                                           | 1.26  |
| <i>ST-Q_item 13</i>       | 2.88                                                                                                           | 0.72  |
| <i>ST-Q_item 14</i>       | 58% up to 5k \$;<br>27,9% up to 10k \$;<br>6,6% up to 50k \$;<br>1,2% up to 100k \$;<br>1,5% more than 100k \$ |       |
| <i>ST-Q_item 15</i>       | 24,9% governments;<br>9,3% private individuals;<br>65,8% both                                                  |       |
| <i>ST-Q_item 16</i>       | 1.49                                                                                                           | 0.5   |
| <i>ST-Q_item 18</i>       | 85,3% yes;<br>14.7% no                                                                                         |       |
| RBS                       | 21.32                                                                                                          | 6     |
| BSSS                      | 3.12                                                                                                           | 0.75  |
| BFI_CO                    | 3.65                                                                                                           | 0.64  |
| BFI_OE                    | 3.60                                                                                                           | 0.63  |
| STAI                      | 49.96                                                                                                          | 8.45  |
| ZTPI_PN                   | 3.21                                                                                                           | 0.94  |
| ZTPI_PP                   | 3.53                                                                                                           | 0.88  |
| ZTPI_PF                   | 1.93                                                                                                           | 0.77  |
| ZPTI_PE                   | 3.08                                                                                                           | 0.78  |
| ZTPI_FN                   | 2.61                                                                                                           | 0.89  |
| ZTPI_FP                   | 3.68                                                                                                           | 0.84  |
| DBTP                      | 2.74                                                                                                           | 0.89  |
| SW                        | 4.33                                                                                                           | 0.63  |
| ATCC                      | 4.29                                                                                                           | 0.54  |
| SN                        | 3.70                                                                                                           | 0.64  |
| PBC                       | 3.86                                                                                                           | 0.63  |
| BI                        | 3.62                                                                                                           | 0.58  |
| PEB                       | 3.89                                                                                                           | 0.59  |
| <i>PEB-Q global score</i> | 3.95                                                                                                           | 0.47  |
| <i>STP-Q</i>              | 72.24                                                                                                          | 17.78 |

*Note.* **ST-Q**=ad hoc questionnaire for space tourism; **SD**=social distance scale; **RBS**=risky behavior scale; **BSSS**=brief sensation seeking scale; **BFI\_CO**=Big Five Inventory, “conscientiousness” subscale; **BFI\_OE**= Big Five Inventory, “openness to experience” subscale; **STAI**=State-Trait Anxiety Inventory (only “trait anxiety” subscale); **ZTPI**= Zimbardo Time Perspective Inventory (**PN**=past negative; **PP**=past positive; **PF**=present fatalistic; **PE**=present hedonistic; **FN**=future negative; **FP**=future positive); **DBTP**=Deviation from a balanced temporal perspective; **SN**=“subjective norms” subscale of questionnaire for pro-environmental behaviors (PEB-Q); **PBC**=“perceived behavioral control” subscale of PEB-Q; **BI**=“behavioral intention to adapt to climate change” subscale of PEB-Q; **PEB**=“pro-environmental behavior” of PEB-Q.

**Table S3.** Correlation analysis between space tourism willingness (STW) and recorded variables.

|                           | <i>STW</i>    |                               |                              |
|---------------------------|---------------|-------------------------------|------------------------------|
|                           | <b>r</b>      | <b>95% CI<br/>Lower limit</b> | <b>95%CI<br/>Upper limit</b> |
| <i>Gender</i>             | -.025         | -.132                         | .083                         |
| <i>Age</i>                | -.037         | -.144                         | .071                         |
| <i>Marital<br/>status</i> | -.052         | -.159                         | .056                         |
| <i>SD</i>                 | -.012         | -.119                         | .096                         |
| <i>RBS</i>                | .054          | -.054                         | .161                         |
| <i>BSSS</i>               | <b>.186**</b> | .08                           | .287                         |
| <i>BFI CO</i>             | .032          | -.076                         | .139                         |
| <i>BFI OE</i>             | -.004         | -.112                         | .103                         |
| <i>STAI</i>               | <b>-.116*</b> | -.22                          | -.008                        |
| <i>DBTP</i>               | -.094         | -.2                           | .013                         |
| <i>PEB-Q</i>              | .028          | -.079                         | .135                         |

*Note.* Pearson's r is reported. \* =  $p < .05$ ; \*\* =  $p < .01$ .
